1 **Fine-scale temporal analysis of genotype-dependent mortality at**  
2 **settlement in the Pacific oyster *Crassostrea gigas***

3 Louis V Plough<sup>1</sup>

4

5 University of Southern California

6 3616 Trousdale Parkway

7 Los Angeles CA 90089 USA

8

9 **Phone:** 410-221-8474

10 **Email:** [lplough@umces.edu](mailto:lplough@umces.edu)

11

12

13

14

15

16

17

18

19

20

21

22

23

24

25

26

27

28 <sup>1</sup>***Permanent/current address:***

29 *University of Maryland Center for Environmental Science*

30 *Horn Point Laboratory*

31 *2020 Horns Pt. Rd.*

32 *Cambridge MD 21613*

33

34 **Abstract**

35 Settlement and metamorphosis mark a critical transition in the life cycle of marine  
36 invertebrates, during which larvae undergo substantial morphological, sensory, and genetic  
37 changes. High mortality during or after metamorphosis is commonly observed in both wild and  
38 hatchery settings, however, the underlying causes of this mortality remain poorly understood.  
39 Previous pair-crossing experiments with the Pacific oyster, *Crassostrea gigas* showed that  
40 substantial genotype-dependent mortality (GDM) occurs around metamorphosis, but, owing to  
41 sparse temporal sampling, it remains unknown whether mortality occurs just before, during, or  
42 after settlement. In this laboratory study, microsatellite marker segregation ratios were followed  
43 daily throughout the settlement and metamorphosis of an inbred, F<sub>2</sub> cross of the Pacific oyster to  
44 examine the fine-scale patterns of GDM in larvae and spat. Genetic control of settlement timing  
45 was also examined using a quantitative trait locus (QTL) mapping approach. Settlement  
46 occurred over nine days (day 18 to day 27 post-fertilization) with 68% of individuals settling on  
47 an early (day 19) and a late (day 24) time point. Tracking the survival of spat for 40 days after  
48 initial settlement revealed almost no post-settlement mortality. Temporal analysis revealed that  
49 three of 11 loci exhibited segregation distortion at metamorphosis, one of which (*Cg205*) was  
50 followed throughout settlement. Alternative temporal patterns of selection against each  
51 homozygote at *Cg205* suggest possible defects in both the competency pathway (inability to  
52 initiate metamorphosis) and the morphogenesis pathway (mortality during the metamorphic  
53 transition). QTL mapping of settlement timing identified three individual and one epistatic QTL  
54 (29% of the variance explained), however, two of these loci were closely linked to markers  
55 exhibiting GDM at metamorphosis, thus making it difficult to distinguish between genetic  
56 variance in settlement timing and differential mortality early or late in settlement. Overall,  
57 results from this study highlight the complex temporal patterns of viability selection during  
58 metamorphosis and show that endogenous mortality during the larval-juvenile transition appears  
59 to be focused during or just prior to metamorphosis. Fine-scale experimental analysis of  
60 settlement can reveal important genetic insights into larval settlement behavior and the sources  
61 of larval mortality, and future studies should be able to further dissect the functional targets of  
62 selection during metamorphosis.

63

## 64 1. Introduction

65 The period of settlement and metamorphosis is critical in the life cycle of marine  
66 invertebrates. It is the final developmental hurdle to successful recruitment, wherein larvae go  
67 through the dramatic ecological and biological transformation from a free-swimming planktonic  
68 larval form to a sessile benthic juvenile. The successful completion of this process has profound  
69 implications for the evolution and ecology of species in the marine environment (Gaines and  
70 Roughgarden 1985, Hunt and Shiebling 1997, Roughgarden *et al.* 1988, Rodriguez *et al.* 1993).  
71 In marine mollusks, metamorphosis is well described, characterized by the complete  
72 rearrangement of the body plan, coinciding with the loss of larval features, such as the velum,  
73 and the emergence of juvenile or adult characteristics, such as the gills (*e.g.* Cole 1938, Hickman  
74 and Gruffyd 1971, Bonar 1976). The process of settlement and metamorphosis comprises two  
75 distinct phases: 1) the attainment of ‘competency’, the developmental capacity to respond to  
76 appropriate settlement cues and to exhibit settlement behavior, and 2) the morphogenetic  
77 transformation that occurs when larvae attach to the substratum and complete metamorphosis  
78 (*e.g.* Degnan and Morse 1995). The role and variety of chemical cues in the induction of  
79 metamorphosis, the developmental attainment of competency, and the consequences of delayed  
80 metamorphosis have been the subjects of much research in the field of larval biology and  
81 ecology (reviewed by Crisp 1974, Degnan and Morse 1995, Pechenik 1990, Rodriguez *et al.*  
82 1993, Hadfield 1986, Pawlik 1992, Jackson *et al.* 2002).

83 Developmental and gene-expression studies in marine molluscs have revealed the  
84 complex nature of the metamorphic transition, showing that the competency and morphogenetic  
85 pathways display unique gene-expression profiles and are regulated independently (*e.g.* Degnan  
86 and Morse 1995, Jackson *et al.* 2005, Jackson *et al.* 2007, Williams *et al.* 2009). Patterns of  
87 increased gene expression late in the larval stages co-occur with the accumulation and  
88 deployment of a threshold level of receptors and signal transducers, which can then respond to  
89 inducible chemical cues that initiate metamorphosis (Degnan and Morse 1995, Jackson *et al.*  
90 2005, Heylund and Moroz 2006). A suite of genes control an anticipatory, ‘competency’  
91 pathway, which begins to form juvenile structures prior to metamorphosis (*e.g.* digestive and  
92 shell formation pathways; Jackson *et al.* 2007), and then the morphogenetic transformation is  
93 dictated by the up-regulation of genes related to apoptosis, cell cycling, protein synthesis, and

94 calcium flux pathways, among others (the ‘morphogenetic’ pathway; Jackson *et al.* 2005,  
95 Jackson and Degnan 2006, Jackson *et al.* 2007, Williams *et al.* 2009). Though there appear to be  
96 clear patterns of gene classes expressed across invertebrate taxa during competency and  
97 metamorphosis (*e.g.* Heylund and Moroz 2006), most studies have focused on only a few marine  
98 gastropods (*Aplysia* and *Haliotus* spp.) and ascidians (*e.g.* Degnan *et al.* 1997, Eri *et al.* 1999,  
99 Kawashima 2005, Jacobs *et al.* 2006), all of which have lecithotrophic larvae. Less is known  
100 about genetic processes at metamorphosis in broadcast spawning marine invertebrates, such as  
101 marine bivalves, with planktotrophic larvae.

102 Metamorphosis in marine invertebrates, and marine bivalves in particular, is  
103 accompanied by substantial mortality. High rates of mortality in newly settled juveniles have  
104 been observed for a wide variety of invertebrate species, and, generally, survival curves of new  
105 settlers are type III: mortality is initially high but decreases rapidly after the first few days or  
106 weeks and then levels off (*e.g.* Rodriguez *et al.* 1993, reviewed by Gosselin and Qian 1997, Hunt  
107 and Sheibling 1997). Early mortality in invertebrates has primarily been estimated in field  
108 studies that examine rates and patterns of mortality after settlement (*e.g.*, Rodriguez *et al.* 1993,  
109 Gosselin and Qian 1996, Hunt and Shiebling 1997); however, many of these studies are only  
110 able to measure “recruitment”, *i.e.*, the survival of a population to a certain time point after  
111 settlement, because monitoring mortality during settlement is difficult, if not impossible, for  
112 many species (*e.g.* Keough and Downes 1982). Few studies accurately measure larval supply,  
113 metamorphosis, and early and late post-settlement periods within the same experiment, thus, a  
114 comprehensive understanding of when mortality occurs during settlement and metamorphosis is  
115 lacking.

116 Experimental laboratory studies allow for more detailed analysis of mortality during  
117 settlement in marine invertebrates, but few such studies exist. Jones and Jones (1983) found that  
118 only a small fraction (10-30%) of pre-metamorphic oyster larvae successfully complete  
119 metamorphosis in laboratory conditions. Haws *et al.* (1993) also noted that substantial mortality  
120 occurred during the metamorphic transition in their detailed examination of biochemical and  
121 physiological changes during metamorphosis of the Pacific oyster *Crassostrea gigas*. Culture  
122 experiments have shown significantly greater post-metamorphic survival associated with  
123 improved diet during the larval stages, suggesting that endogenous processes related to energy  
124 acquisition prior to metamorphosis are important (*e.g.* Gallagher et al 1986, Gallagher and Mann

125 1986, Helm *et al.* 1991, Coutteau *et al.* 1994, Pernet and Tremblay 2004). Recent experimental  
126 genetic work with the Pacific oyster has confirmed high mortality at metamorphosis, finding that  
127 half of the deleterious recessive mutations uncovered in inbred crosses are expressed at this stage  
128 of the life cycle (Plough and Hedgecock 2011). Plough and Hedgecock (2011) determined the  
129 stage-specific timing of genotype-dependent mortality by following the temporal onset of  
130 genotype deficiencies (selection against specific genotypes) in daily larval samples, a post  
131 settlement sample, and an adult sample. The finding of substantial, genetic mortality during  
132 settlement highlights the important physiological and developmental changes associated with this  
133 transition, however, there were no temporal genetic data collected during metamorphosis in  
134 Plough and Hedgecock (2011), and thus the fine scale temporal patterns of selection remain  
135 unknown.

136 In the current study, temporal genetic sampling was focused on the period of settlement  
137 and metamorphosis to determine the detailed timing of genotype dependent mortality during  
138 metamorphosis. An inbred, F<sub>2</sub> family was allowed to set naturally on adult shell, and daily  
139 samples were taken of spat (recently settled juvenile oysters) and larvae still residing in the water  
140 column, throughout the settlement period. Utilizing a similar experimental design to Plough and  
141 Hedgecock (2011), mutations affecting metamorphosis were first identified by the specific  
142 developmental timing of segregation distortion in linked genetic markers: *i.e.* those markers that  
143 were observed to be distorted in juvenile samples (day 60, post-settlement) but were in  
144 Mendelian proportions in pre-metamorphic, late larval samples were identified as candidates.  
145 Then, the segregation ratios and genotype deficiencies of these metamorphosis-associated  
146 markers were followed through late larval and spat populations, to examine the temporal patterns  
147 of selection during and post-metamorphosis. Three hypotheses are proposed to explain how  
148 selection and mortality might proceed: 1) larvae are able to advance through metamorphosis and  
149 settle, but die soon after, which can be detected by high mortality of juveniles after settlement  
150 and changes in segregation ratios in early vs. late juvenile samples; 2) larvae begin  
151 metamorphosis, but die sometime during this transition, thus, affected genotypes are present in  
152 the water column at time  $i$  ( $t_i$ ), but at  $t_{i+1}$ , they are missing from both the spat and larval pool;  
153 and 3) individuals with affected genotypes are not able to begin metamorphosis and are thus are  
154 deficient in the spat population but remain and perhaps accumulate in the larval population,  
155 because settlement is delayed or fails to occur altogether. Finally, early vs. late settling spat

156 were genotyped to determine if there were markers or regions of the genome associated with  
157 variation in settlement timing that were independent of those causing mortality at  
158 metamorphosis. The detailed sampling and genotyping strategy carried out in this experiment  
159 sheds light on the fine-scale timing of genotype-dependent mortality at settlement, and  
160 determines the extent to which competency, morphogenesis, or post settlement processes are  
161 affected by the expression of genetic load.

## 162 **2. Materials and Methods**

### 163 **2.1. Crosses and culturing methods**

164 Inbred lines *51* and *35* were derived from a naturalized population of *C. gigas* in Dabob  
165 Bay, WA, with initial families made from pair crosses of wild individuals in 1996 (Hedgecock  
166 and Davis 2007). These lines were inbred (full-sib mating) for four generations leading up to the  
167 F<sub>1</sub> hybrid cross that was made in 2007. In 2009, the experimental F<sub>2</sub> family ( $f = 0.397$ ) was  
168 created by mating a pair of male and female full-siblings from the 2007 *51* × *35* F<sub>1</sub> hybrid cross.  
169 Crosses were performed at the University of Southern California (USC), Wrigley Marine  
170 Science Center (WMSC) on Catalina Island, CA. Pedigrees of parents were verified with  
171 microsatellite DNA markers (e.g. Hedgecock and Davis 2007)

172 The cross was performed by stripping gametes from a single male and a single female  
173 and combining the eggs and sperm in a two-liter beaker of fresh seawater for fertilization (Breese  
174 and Malouf 1975, Hedgecock and Davis 2007). After a one-hour incubation, one million  
175 zygotes were stocked in a 200-l vessel ( $5 \text{ larvae} \cdot \text{ml}^{-1}$ ) with fresh sea water. Starting at 24 h post-  
176 fertilization, larvae were fed a diet of *Isochrysis galbana* (Tahitian Isolate) every two days, at a  
177 starting concentration of  $30,000 \text{ cells} \cdot \text{ml}^{-1}$ , which was increased, as larvae grew, following  
178 standard larval rearing protocols for the Pacific oyster (Breese and Malouf 1975, Hedgecock *et*  
179 *al.* 1996, Plough 2012).

### 180 **2.2. Deployment of shell and sampling protocol**

181 At day 18, a substantial number of larvae had developed eye spots and were displaying  
182 probing with the larval foot, both characteristic of settlement behavior (Bonar 1976, Kennedy *et*  
183 *al.* 1996). Cured adult shell was deployed on a cylindrical harness with a bottom of Vexar®

184 mesh, as a substrate for natural settlement (Fig. 1a). Adult shell was placed with the nacreous  
185 side facing both up and down and with shells overlapping to form random 3-D structures, in  
186 order to give larvae a number of different substrates and angles to settle on regardless of their  
187 orientation to light or gravity, which can affect settlement behavior (Kennedy *et al.* 1996, Baker  
188 1997, Baker and Mann 1998). Starting in the afternoon on day 18, and at about the same time  
189 each day thereafter, the harness was carefully pulled up, and the surface of shells were sprayed  
190 vigorously with seawater to return any probing or non-settled larvae back to the 200-l vessel and  
191 the larval pool. Larvae were filtered out of the 200-l vessel and concentrated for survival  
192 estimates each day during settlement. Survival was calculated by counting the number of larvae  
193 in four to six random sub-samples of known volume (50-100  $\mu$ l) from homogeneously mixed,  
194 concentrated cultures (500-1000 ml). These counts were then multiplied by the inverse of the  
195 fraction of the subsample volume to the total volume ( $count \times \frac{total\ ml}{subsample\ ml}$ ), and averaged  
196 across replicates to estimate the mean number of larvae remaining (surviving) each day. For  
197 each daily estimate of settlement, spat were counted shell by shell, under a dissecting microscope  
198 at 8-48 $\times$ , until no more could be found. This involved inspecting both sides of the shell under a  
199 range of magnifications and orientations. New shells that had been incubating for 24 hours in  
200 fresh, filtered seawater, were then placed on the harness, and lowered back into the 200-l tank,  
201 which had been rinsed and refilled with fresh seawater and algae. Finally, the counted larvae  
202 were placed back into the tank. This process was repeated each day until no larvae remained in  
203 the water column. From the counts of larvae,  $L$ , at time  $i$  ( $t_i$ ) and  $t_{i+1}$ , and the count of settlers,  $S$ ,  
204 at  $t_{i+1}$ , larval mortality (M) between two adjacent days was calculated as:  $M = L_i - (L_{i+1} +$   
205  $S_{i+1})$ . Shells that had spat settling on a particular day were then collected and placed in a  
206 Vexar® mesh bag in the upwelling nursery system and grown out until day 60 to increase the  
207 amount of tissue for DNA extraction (Fig 1b). Spat were fed live *Isochrysis galbana* and  
208 Shellfish Diet 1800 (Reed Mariculture, Campbell, CA) every 6 six hours.

209 To determine if mortality occurred post-settlement (after the day on which individuals  
210 were recorded as settling), a subset of metamorphosed spat from day 19, 21, and 24, were  
211 followed to day 60 to determine survival through the early juvenile stage. This was done by  
212 marking an area around 50 (live) spat on two shells from each of the three days, and then  
213 counting the number of live spat on these same, marked shell areas at day 60.



### 214 **2.3. DNA extraction, PCR, and electrophoresis**

215 At 60 days, individual spat were scraped off shells and placed directly in Qiagen tissue  
216 lysis buffer (Qiagen, Valencia CA) in individual tubes and stored at -80°C until extraction using  
217 the Qiagen DNeasy blood and tissue kit. Live larvae were placed in small volumes of sterilized  
218 water with a drop of 70% ethanol to retard their movement; then, they were pipetted individually  
219 into 96-well PCR plates containing extraction buffer consisting of 1× PCR buffer (Promega,  
220 Madison, Wisconsin), 0.2 mM EDTA, 1.0 µg/µl proteinase K (Shelton Scientific, Connecticut)  
221 and purified H<sub>2</sub>O. Plates were frozen at -80°C until extraction (Plough and Hedgecock 2011).  
222 Larvae were extracted in 40 µl volumes in a 96-well thermalcycler (BioRad Tetrad, Hercules,  
223 CA), held at 56°C for three hours, followed by 15 minutes at 95°C. Parent tissue was stored in  
224 70% ethanol at 4°C until extraction and DNA was extracted from 10-25 mg of tissue, using either  
225 the Qiagen DNeasy animal tissue kit or the Gentra Puregene tissue kit (Qiagen, Valencia CA),  
226 following the manufacturer's protocols.

227 Eighty-four microsatellite markers cloned from the Pacific oyster were tested in this  
228 study (Magoulas *et al.* 1998, McGoldrick *et al.* 2000, Huvet 2000, Li *et al.* 2003, Sekino *et al.*  
229 2003, Yamtich *et al.* 2005, Yu and Li 2007, Wang *et al.* 2007). Genotyping of microsatellites  
230 was carried out as described previously (Plough and Hedgecock 2011, Plough 2012) and 46  
231 markers were found to be informative, all of which are on published linkage maps (Hubert and  
232 Hedgecock 2004, Hubert *et al.* 2009, Plough and Hedgecock 2011). From these 46 markers, a  
233 subset of 24 were chosen for the QTL mapping analysis (see below), with the aim of having at  
234 least two markers on each of the 10 linkage groups, thereby maximizing genomic coverage with  
235 the fewest markers.

### 236 **2.4. Genetic analysis of mortality during settlement**

237 To identify markers that became distorted during settlement/metamorphosis, markers  
238 were, first, tested for significant deviations from expected Mendelian ratios in a sample of 60-  
239 day-old spat ( $n = 192$ ) made up of a pooled sample of individuals that settled either on day 19 or  
240 day 24. These two days were chosen because they represented the bulk of the settlement (68%  
241 of spat settled on day 19 or day 24; Fig. 2), making the pooled sample fairly representative of the  
242 total settled population that would have been sampled at day 60 without regard to settlement  
243 timing. Markers were only considered for analysis during metamorphosis if they exhibited



244 segregation distortion in the end-point, day 60 pooled spat sample. Once markers exhibiting  
245 segregation distortion in the pooled spat sample were identified, they were genotyped in day-18  
246 larval samples to identify markers that exhibited segregation distortion (selection) before  
247 metamorphosis and thus were not candidates of genotype dependent mortality at metamorphosis.  
248 Markers that exhibited Mendelian segregation ratios just before metamorphosis (day 18) but  
249 showed distorted segregation ratios in the day-60 spat sample were then genotyped in larvae and  
250 spat from each day throughout settlement and metamorphosis.

## 251 **2.5. Genetic analysis of settlement timing**

252         Spat settling on day 19 and day 24 (see Fig. 2) were used to examine possible genetic  
253 differences between early and late settling individuals. For an initial, single marker analysis, 96  
254 spat from the early and the late settlement samples were genotyped at 24 loci and tested for  
255 heterogeneity between the two settlement samples with contingency chi-square tests using the  
256 program ‘Chirxc’ (Zaykin and Pudovkin 1992). For the genome-wide analysis of variation in  
257 settlement timing, linkage maps were first constructed with day 19 and day 24 spat samples  
258 pooled ( $n = 192$ ), using the CP (cross pollinator) population type in JoinMap 3.0 (VanOoijen and  
259 Voorrips 2001). The Kosambi mapping function with a minimum likelihood of the odds (LOD)  
260 score of 2.0 was used for linkage group assignments, though most linkage groups had LOD  
261 scores well above 4.0. Phase was determined by JoinMap 3.0, from the frequencies of parental  
262 and recombinant types. Deviations from Mendelian segregation ratios may affect linkage  
263 mapping (Zhu *et al.* 2007), so marker order and distances were compared with previously  
264 published linkage maps, which were constructed using larval samples with little segregation  
265 distortion (e.g. Hubert and Hedgecock 2004). If markers that should have mapped, failed to  
266 map, locations were taken from published maps (Hubert and Hedgecock 2004, Hubert *et al.*  
267 2009, Plough and Hedgecock 2011). Genomic coverage was estimated with the equation  
268  $GC = 1 - e^{-2*dn/L}$ , where  $d$  = mean inter-marker distance and  $n$  = total number of markers  
269 assigned to linkage groups, and  $L$  is the estimated map length (Bishop *et al.* 1983).

270         QTL analysis was performed in R/qtl (v.1.1; Broman *et al.* 2003), under a binary trait  
271 model, (early vs. late settlement, day 19 vs. day 24), using the outcross settings. A one-  
272 dimensional scan for single QTL was first performed (‘scan-one’ module) and 5% significance  
273 thresholds at the genome-wide and chromosome-wide level were calculated with 1000

274 permutations. Next, genetic interaction was tested at every position in the genome, using a two-  
275 QTL model ('scan-two' module; significance adjusted with 1000 permutations). Once  
276 significant QTL were identified, they were fit into an overall multiple regression ANOVA  
277 model, using a backwards selection procedure to find the best model with lowest model  
278 comparison criterion.

## 279 **3. Results**

### 280 **3.1. Observed settlement and mortality**

281 Larvae showed the characteristic signs of settlement behavior (*e.g.* eyespots and probing  
282 foot) on day 17 post-fertilization and adult shells were deployed starting on day 18. Around 30  
283 larvae had already settled on day 17, sticking to the bottom of the poly-carbonate tank in the  
284 absence of adult shell; these were not sampled. On the initial day of sampling, day 18, the  
285 number of surviving larvae was  $132,000 \pm 7,500$  (from a starting stock of 1,000,000 embryos),  
286 which represents 13.2% survival to the end of the larval stage (Fig. 2). Settlement occurred over  
287 nine days, from day 18 to day 27, with settlement peaks at day 19 (1,084 counted spat) and day  
288 24 (1,484 spat), indicating that settlement in this family followed a bi-modal distribution. In  
289 total, 3,776 settlers were counted, representing 0.37 % survival to the spat stage over the 60 days  
290 of the experiment. Larval abundance appeared to drop sharply on the days when a substantial  
291 number of settlers were recorded (*e.g.* day 19 and day 24) and a corresponding spike in larval  
292 mortality was observed, despite the correction for settled spat (Fig. 2). After day 24, the  
293 abundance of larvae steadily declined, despite few additional spat setting. Mortality of new  
294 settlers followed for approximately 40 days after initial settlement (examined at day 60) was  
295 minimal, with estimates of 2%, 0% and 2% for settlers on day 19, 21, and 24, respectively. In  
296 general, very few dead or empty shells (spat) from any settlement day were observed. Because  
297 very little post-settlement mortality was observed, segregation ratios at markers were not  
298 followed from initial settlement samples to day 60 settlement samples.

### 299 **3.2. Segregation analyses and segregation distortion during settlement**

300 Eighty-four microsatellite markers were tested, yielding 46 informative markers in the  
301 parents of the experimental progeny. A subset of 24 markers, comprising at least two loci on

302 each of the 10 Pacific oyster linkage groups (LG), were tested for distortion of segregation ratios  
303 in spat settling on day 19 ( $n = 96$ ) and spat settling on day 24 ( $n = 96$ ), which were harvested  
304 (sampled) at 60 days post fertilization. None of the three informative markers on LG 2 could be  
305 scored, so these markers and this linkage group were not included in the analysis, leaving 21  
306 markers for further analysis. Significantly distorted segregation ratios at the  $\alpha = 0.05$  level were  
307 found at 13 of 21 (62%) markers (Table 1). These distortions were mainly caused by  
308 deficiencies of homozygous genotypes or heterozygote carriers of parentally shared, presumably  
309 identical-by-descent, deleterious alleles. Markers with distorted segregation ratios were  
310 distributed broadly across the genome, on eight out of the nine linkage groups analyzed.  
311 Genotyping all but two (*Cg162* and *Cg156*) post-settlement distorted markers in the day-18  
312 larval sample revealed that markers *Cg109*, *Cg205*, and *Cg175* on LG 4, LG 6, and LG 8,  
313 respectively, exhibited Mendelian segregation ratios (three of 11 tested; Table 1), indicating that  
314 deleterious alleles linked to these markers were first expressed during or just after  
315 metamorphosis.

316 Difficulties in genotyping larval samples only allowed temporal analysis of *Cg205* after  
317 day 19. In the pooled spat sample for *Cg205* (post-metamorphosis, “cumulative” sample; Fig.  
318 3), significant deficiencies in both homozygous genotypes were evident, suggesting that *Cg205*  
319 might be linked to two deleterious alleles in repulsion phase (see Plough and Hedgecock 2011).  
320 Starting with the inspection of genotypic data for day-19 spat, observed segregation ratios were  
321 highly distorted, with substantial deficiencies of the two homozygous genotypes (Table 2, Fig.  
322 3). Segregation ratios in day-19 larvae did not deviate from their Mendelian expectation  
323 however, indicating that genotypes deficient in the spat sample were still present among larvae in  
324 the water column. At the next larval sample, day 21, segregation ratios were significantly  
325 distorted, but only the *AA* genotype was deficient; the *BB* genotype did not deviate from its  
326 expected 1:2 ratio, relative to the frequency of *AB*. At day 24, segregation ratios in the larval  
327 sample were dramatically different from the previous time point (day 21), with a much larger  
328 proportion of *BB* genotypes than expected (60% compared with the expected 25%), and  
329 significantly fewer *AB* genotypes, while the number (and relative frequency) of *AA* genotypes  
330 remained highly deficient (only five spat with *AA* genotypes were observed in both day 21 and  
331 day 24 larval samples; Fig. 3, Table 2). In the day-24 spat sample, both homozygous genotypes  
332 were again observed to be deficient, and segregation ratios were dramatically different from the

333 day 19 sample, owing to a greater frequency of *BB* individuals settling ( $P < 0.001$ ,  $r \times c$   
334 contingency chi-square test; Zaykin and Pudovkin 1992). At the final larval time point, day 26,  
335 the *BB* genotype was in even greater excess (79% compared to the expected 25%), while the *AA*  
336 genotype was completely absent; the *AB* genotype was deficient at this time point as well (Table  
337 2, Fig. 3). In the day-26 spat sample, a slight increase in *BB* genotypes was observed, but both  
338 the *BB* and *AA* genotypes were significantly deficient relative to Mendelian expectation, a result  
339 consistent with observed segregation data for the cumulative, total spat sample (days 19, 24, and  
340 26 combined; Fig. 3). In summary, individuals with the *AA* genotype suffered relatively swift  
341 mortality early in settlement (day 19 to day 21) with few individuals surviving in the water  
342 column (larvae) or setting successfully after this point. In contrast, while *BB* individuals were  
343 also deficient in the spat samples relatively early in settlement (day 19), they were present in the  
344 larval pool throughout settlement, becoming the dominant genotype remaining in the water  
345 column late in the larval period, but never setting in appreciable numbers even in the last days of  
346 settlement. The differing temporal patterns of mortality and segregation distortion in the two  
347 homozygous genotypes suggest that *Cg205* is linked to two deleterious recessive mutations in  
348 repulsion phase, with very different patterns of selection (Plough and Hedgecock 2011).

### 349 **3.3. QTL mapping and genetic analysis of settlement timing**

350 Twenty-one markers were assigned to 8 of 10 linkage groups, with assignments as  
351 expected from previous crosses and studies (Hubert and Hedgecock 2004, Hubert *et al.* 2009,  
352 Plough and Hedgecock 2011), marker phase was successfully estimated within linkage groups.  
353 Linkage group two lacked informative markers, and map distances for the two markers on  
354 linkage group seven were obtained from previously published maps because markers were  
355 separated by more than 40 cM; phase was still successfully estimated from segregation data in  
356 this linkage group. Total map length was 369 cM, calculated by summing all inter-marker  
357 distances, with a mean inter-marker distance of 17.65 cM (maximum 42 cM; LG 7). Estimated  
358 genomic coverage for this map was 86% (Bishop *et al.* 1983). Single-marker analysis revealed  
359 that four of the 21 markers, *Cg205*, *Cg162*, *Cg140* and *Cg109*, had significant heterogeneity in  
360 genotype proportions between days 19 and 24, indicating that these markers might be associated  
361 with settlement timing (Table 3).

362 Associations between markers and settlement timing were further assessed in a genome-  
363 wide context with quantitative trait locus (QTL) mapping analyses, in which the phenotype, time  
364 to settlement, was coded as a binary trait (early or late; settlement on day 19 or 24). The one-  
365 dimensional scan identified three QTL on linkage groups 4, 6, and 10 (QTL 1-3; Table 4). The  
366 most significant QTL was well above the genome-wide threshold LOD score of 2.99 (QTL 3,  
367 LOD=3.794; Table 4) and was located on linkage group 10, closely linked to marker *Cg140*.  
368 The other two QTL, one on LG 4 at *Cg109* (QTL 1, LOD=2.567) and one on LG 6 near *Cg205*  
369 (QTL 2, LOD=2.714), were slightly below the genome-wide threshold but well above the  
370 chromosome-wide thresholds of 2.36 and 1.60 for LG 4 and LG 6, respectively, and are therefore  
371 considered suggestive QTL (Table 4). The two-dimensional scan for interacting QTL identified  
372 one significant interaction between genomic regions on LG 5 and LG 8 (QTL 4; LG 5 at 10cM,  
373 and LG 8 at 40cM, LOD = 5.642), which was above the  $\alpha = 0.05$  genome-wide interaction  
374 threshold LOD score of 5.46. Fitting a model for the four identified QTL (from the single QTL  
375 scan and the epistasis scan), the ‘drop-one’ analysis of variance (ANOVA) method was used to  
376 examine the fit of the model with each QTL included and then dropped in sequential order. In  
377 the drop-one analysis, all QTL remained significant except for the interaction QTL, which was  
378 marginally significant ( $P=0.057$ ). Results of the ANOVA with four QTL indicated that the  
379 model was highly significant ( $P<0.00001$ ), with the four QTL explaining almost 29% of the  
380 variance in settlement time; the percent variation explained by the four QTL is an estimate of  
381 broad sense heritability for this trait. The strongest effect was at QTL3 (*Cg140*), which alone  
382 explained 8.7 % of the variance in settlement timing. Examining the gene effects of the single  
383 QTL at the nearest markers, *Cg140* (QTL 3) demonstrated a qualitatively additive pattern; the  
384 binomial probability of settlement on day 24 (late settlement) was 0.83, 0.49, and 0.33 for  
385 individuals with genotypes *AA*, *AB*, and *BB*, respectively (Fig. 4). Patterns of gene action at  
386 *Cg205* and *Cg109* were less straightforward but appeared to be qualitatively non-additive (Fig.  
387 5a,b).

#### 388 **4. Discussion**

389 In this study, daily sampling of larvae and spat during the settlement of an  $F_2$  family of  
390 the Pacific oyster was carried out to examine, in detail, the patterns of settlement and genotype-  
391 dependent mortality during metamorphosis. I first describe the general patterns of settlement and

392 mortality from the observed counts of settlers and larvae, and then turn to the temporal genetic  
393 analysis of segregation distortion during metamorphosis, which addresses the biologically  
394 relevant hypotheses regarding patterns of mortality during settlement and metamorphosis.  
395 Finally, I discuss results of the QTL analysis of settlement timing and the resolution of genetic  
396 patterns underlying early vs. late settlement with genotype dependent mortality at  
397 metamorphosis.

#### 398 **4.1. Settlement patterns and post-settlement mortality**

399 Mortality during settlement was very high, with only 2.8% of late stage larvae surviving  
400 as spat at day 60. Compared with survival up to the end of the larval stage (~13%), survival  
401 through settlement was almost five-times lower, which confirms settlement and metamorphosis  
402 as a critically important life-history transition, during which substantial mortality occurs (*e.g.*  
403 Hunt and Sheibling 1996, Plough and Hedgecock 2011, Plough 2012). Survival over the  
404 duration of the experiment (early embryo to day 60 spat) was 0.37%, which is consistent with  
405 previous reports of substantial early mortality in the Pacific oyster (Bucklin 2003, Plough and  
406 Hedgecock 2011, Plough 2012, Plough *et al.* *in review*). Comparing daily settlement and larval  
407 abundance, high rates of mortality in the larval pool appeared to coincide with the peaks of  
408 settlement (Fig. 1), suggesting that larval mortality was associated with some aspect of the  
409 metamorphic transition: larvae were “trying and dying”. Another striking result was the bimodal  
410 distribution in settlement timing: pulses of settlement on days 19 and 24 accounted for 68% of all  
411 settlement in this family over the nine-day period. Field-based recruitment studies have shown  
412 that settlement during the course of a season is often non-random, with specific peaks of  
413 settlement and variable survival over time (*e.g.* Raimondi 1990, Pineda 1994, Balch and  
414 Sheibling 2000, Broitman *et al.* 2000, Pineda *et al.* 2006). Temporal variation in settlement in the  
415 marine environment could be related to a number of factors including reproductive condition,  
416 spawning timing, or oceanographic features such as currents and food availability, none which  
417 were variable or relevant in this experiment. Instead, variation in settlement timing, particularly  
418 the early and late peaks of settlement, may somehow depend on genetic variability for settlement  
419 timing within the family (see below). Only one family was examined in the current study, thus,  
420 the observed settlement patterns may not be general; however, a similar bi-modal pattern was  
421 observed in a previous experiment (Plough, unpublished data).



422 Analysis of spat survival 40 days after initial settlement showed conclusively that very  
423 little endogenous (genotype-dependent) mortality occurs post-settlement. Essentially, once  
424 larvae had completed metamorphosis and appeared as spat on adult shell (time to census was 24  
425 hours or less), individuals survived at a rate of nearly 100%. These findings support previous  
426 observations of low genotype-dependent mortality after metamorphosis (Bucklin 2003, Plough  
427 and Hedgecock 2011). Settlement studies of natural populations do, of course, find substantial  
428 post-settlement mortality in a variety of marine invertebrates (Hunt and Shiebling 1996, Gosselin  
429 and Qian 1997, Pineda et al. 2006) and for oysters in particular (e.g. Kennedy *et al.* 1996, Newell  
430 *et al.* 2000). In this experiment, no external sources of mortality, such as predators or  
431 environmental stressors were present, thus, these results suggest only that genetic or endogenous  
432 causes of mortality do not greatly affect oyster survival once settlement is complete, at least  
433 under the laboratory conditions used in this study.

#### 434 **4.2. Temporal genetic analysis of mortality during settlement and** 435 **metamorphosis**

436 At the outset of this study, three hypotheses were proposed to explain the previously  
437 observed patterns of substantial genotype-dependent mortality at metamorphosis in inbred  
438 crosses of the Pacific oyster: 1) mortality occurs post-settlement, owing to genetic or  
439 developmental abnormalities affecting fitness just after the transition to the juvenile stage, 2)  
440 mortality occurs during the process of metamorphosis, owing to the expression of deleterious  
441 mutations in genes critical for morphogenesis and, 3) mortality occurs prior to metamorphosis,  
442 owing to the expression of mutations affecting the development of competency or delaying  
443 metamorphosis. The observation of very minimal mortality after settlement and metamorphosis  
444 suggests that the expression of genetic load does not greatly affect viability after metamorphosis  
445 and, thus, hypothesis one is falsified, at least based on data from the current experiment and our  
446 particular culture conditions. However, given the alternative temporal patterns of selection  
447 against the two homozygous genotypes at marker *Cg205* during settlement, there is support for  
448 the hypotheses that selection is acting at or just preceding metamorphosis (hypotheses two and  
449 three). The relatively early and rapid mortality of *AA* individuals during metamorphosis in both  
450 the larval and spat samples suggests the expression of a linked, deleterious recessive mutation  
451 possibly affecting the morphogenetic transition (hypothesis 2). In contrast, selection against  
452 individuals possessing the *BB* genotype appeared to be delayed in the larval samples (high



453 frequency of *BB* larvae on day 26 that never settled in appreciable numbers), which suggests that  
454 the *B* allele may be linked to a mutation causing either a delay in metamorphosis or the inability  
455 to develop competence and thus begin metamorphosis (hypothesis 3). Of course, it is impossible  
456 to explicitly link the observed temporal patterns of selection against each homozygote to specific  
457 defects in the morphogenetic or competency pathways, i.e. genes, thus our evaluation of the  
458 developmental processes affected is necessarily somewhat qualitative. However, the two  
459 different temporal patterns of selection at *Cg205* align well with what we might expect to  
460 observe in individuals that fail to initiate metamorphosis (*BB*) or that die during the metamorphic  
461 transition (*AA*). Because only a single marker was followed, it is unknown whether mortality  
462 related to pre-metamorphic processes (competency or initiation of metamorphosis) or defects in  
463 the morphogenetic transition are more typical. Clearly, more markers need to be included across  
464 a large number of families to make any conclusive statements about the patterns of metamorphic  
465 mortality in Pacific oysters. Overall, with segregation data at *Cg205*, there is support for both  
466 hypothesis two and three; endogenous mortality appears to be confined to the larval stages and to  
467 metamorphosis, which is again consistent with observations of substantial larval and setting  
468 mortality in the hatchery (Plough and Hedgecock 2011, Plough 2012, Plough et al. *in review*).  
469 Endogenous mortality caused by the expression of harmful allelic variants may be confined to  
470 the early life history stages, because this part of the life cycle is marked by the most substantial  
471 developmental changes (multiple larval developmental stages and metamorphosis), while, after  
472 the transition to the juvenile stage and associated ecology, few drastic morphological and  
473 physiological shifts occur. In other words, most of the “new” genes that are called upon in  
474 response to developmental and ecological shifts will already have been “switched on” by the  
475 early juvenile phase, and relatively little mortality, owing to large-effect, loss-of-function  
476 mutations in critical developmental pathways is expected.

### 477 **4.3. QTL analysis of settlement timing**

478 The finding of significant genetic variance in settlement timing (29% variance explained  
479 by 4 QTL) agrees with previous studies by Jackson *et al.* (2005) and Levin et al. (1996), who  
480 also found significant genetic (paternal) effects on the development of competency and early  
481 settlement in crosses of the vetigastropod *Haliotus spp.* and the polychaete *Streblospio benedici*,  
482 respectively. The current study is the first to associate specific genetic markers with settlement

483 timing variation, and even with relatively sparse genomic coverage (21 markers), there is  
484 evidence of loci with major effects on variation in this important larval trait. Furthermore, the  
485 finding that one of the markers linked to settlement timing QTL showed qualitatively additive  
486 patterns of gene action (Cg 140; Fig. 4) suggests that natural or artificial selection could  
487 directionally shift mean time to settlement or increase its uniformity (reduced variance), both of  
488 which might be valuable breeding improvements for the oyster aquaculture industry (negative  
489 correlations with other value traits would need to be examined). Though specific larval  
490 behaviors that influence the actual timing or choice of settlement may be associated with the  
491 identified QTL, it is possible, or even likely, that other correlated traits could also explain genetic  
492 differences between early and late settlement. Time to settlement is essentially a composite  
493 larval trait, integrating growth rate at multiple larval stages as well as the attainment of  
494 competency, and genetic variance in any of these larval or developmental traits may be reflected  
495 in the apparent association between genotype and time to settlement. Indeed, previous studies in  
496 the Pacific oyster have shown that hatchery selection for larval growth rate has resulted in a  
497 simultaneous decrease in the average time to settlement, suggesting that growth rate and  
498 settlement timing may be correlated (Taris *et al.* 2005). Additional evidence from quantitative  
499 genetic studies has confirmed that genetic correlations between larval growth rate and time to  
500 settlement exist (e.g. Ernand *et al.* 2003). Larval growth rate was not independently measured in  
501 this study, so a direct comparison of genetic variance for growth and settlement timing is not  
502 possible. Nevertheless, the identification of specific genetic markers that are associated with  
503 variance in larval duration is significant, and future QTL-mapping studies employing greater  
504 marker densities and measurements of other larval growth-related traits will be better able to  
505 characterize loci underlying variation in the larval developmental program.

506 It is also important to note the possibility that the identification of significant QTL for  
507 settlement timing could also be explained by genotype-specific mortality during settlement. For  
508 example, the apparent delay of metamorphosis caused by one of the linked mutations at locus  
509 *Cg205* (genotype *BB*) could also drive the association of this marker and heterogeneity in  
510 settlement timing. Indeed, two of the three identified QTL for settlement timing were also  
511 associated with deleterious mutations acting during metamorphosis (*Cg205* and *Cg109*), which  
512 supports this hypothesis. In these cases, it is difficult to distinguish between the action of  
513 genotype-dependent mortality and alleles that directly alter settlement behavior and ultimately

514 the timing of settlement. On the other hand, the most significant QTL identified in this study  
515 appears to be independent of genotype-dependent mortality at metamorphosis. *Cg140* (closely  
516 linked to QTL 3) did not experience significant genotype dependent mortality (chi-square  
517 goodness-of-fit test in the final, pooled, day 60 spat sample,  $P=0.088$ ; Table 1), which suggests  
518 it is not closely linked to a viability mutation. Thirty centiMorgans (cM) away on the same  
519 linkage group (LG 10), *Cg129* is significantly distorted, but prior to metamorphosis ( $P<0.0001$ ,  
520 goodness-of-fit chi-square test for the day 18 larval sample; Table 1), demonstrating that while  
521 there is genotype-dependent mortality on this linkage group, it is pre-metamorphic and does not  
522 appear to influence genotype frequencies at *Cg140*. Thus, genotype-dependent mortality during  
523 metamorphosis cannot explain genotype frequency differences between early and late settlement  
524 for the QTL linked to *Cg140*. The epistatic QTL identified in this study (QTL 4) is also not  
525 likely to be explained by genotype-dependent mortality at metamorphosis, as interactions among  
526 loci linked to deleterious mutations (viability loci) were virtually absent in all previous crosses  
527 examined (Bucklin 2003, Plough and Hedgecock 2011, Plough 2012). Overall, the confounding  
528 effects of genotype-dependent mortality (at metamorphosis) on the identification of QTL for  
529 settlement timing warrant serious consideration but likely do not completely account for the QTL  
530 results in this particular experiment.

531

## 532 **Acknowledgements**

533 The author wishes to thank D. Hedgecock and S. Edmands for helpful comments and suggestions  
534 on previous versions of the manuscript. This work was funded in part by an Oakley Fellowship  
535 and a Rose Hills foundation fellowship to L. Plough.

536

537

## 538 **References**

- 539 Baker, P., 1997. Settlement site selection by oyster larvae, *Crassostrea virginica*: Evidence  
540 for geotaxis. *J. Shellfish Res.* 16, 125-128
- 541 Baker, P., Mann, R., 1998. Response of settling oyster larvae, *Crassostrea virginica*, to specific  
542 portions of the visible light spectrum. *J. Shellfish Res.* 17: 1081-1083.
- 543 Balch, T., Scheibling, R.E., 2000. Temporal and spatial variability in settlement and recruitment  
544 of echinoderms in kelp beds and barrens in Nova Scotia. *Mar. Ecol. Prog. Ser.* 205, 139-  
545 154.
- 546 Bishop, D.T., Cannings, C., Skolnick, M., Williamson, J.A., 1983. The number of polymorphic  
547 DNA clones required to map the human genome, in: Weir, B. S. (Ed.), *Statistical*  
548 *Analysis of DNA Sequence Data*. Marcel Dekter, New York, pp. 181–200.
- 549 Bonar, D.B., 1976. Molluscan metamorphosis: A study in tissue transformation. *Amer. Zool.* 16,  
550 573-591.
- 551 Breese, W.P., Malouf, R.E., 1975. Hatchery manual for the Pacific Oyster, *Crassostrea gigas*  
552 (Gould). Oregon Agricultural Experiment Station Special Report No, 443, and Oregon  
553 State University Sea Grant College Program Publ. No. ORESU-H-75-002, 22 pp.
- 554 Broitman, B.R., Blachette, C.A., Menge, B.A., Lubchenko, J., Krenz, C., Foley, M., Raimondi  
555 P.T., Lohse, D., 2008. Spatial and temporal patterns of invertebrate recruitment along the  
556 west coast of the United States. *Ecol. Mono.* 78(3), 403–421.
- 557 Broman, K.W., Wu, H., Sen, S., Churchill, G.A., 2003. R/qtl: QTL mapping in experimental  
558 crosses. *Bioinformatics* 19, 889-90.
- 559 Bucklin, K.A., 2003. Analysis of the Genetic Basis of Inbreeding Depression in the Pacific  
560 Oyster *Crassostrea gigas*. Ph.D. Dissertation, University of California at Davis.
- 561 Cole, H.A., 1938. The fate of the larval organs in the metamorphosis of *Ostrea edulis*. *J. Mar.*  
562 *Bio. Assn., U.K.* 23, 469-484.
- 563 Coutteau, P., Caers, M., Mallet, A., Moore, W., Manzi, J.J. Soergeloos, P., 1994. Effect of lipid  
564 supplementation on growth, survival, and fatty acid composition of bivalve larvae, in:  
565 Kestemont, P., Muir, J., and Williot, P., (Eds.) *Measures for Success Proceedings of*  
566 *Bordeaux Aquaculture 1994*, Mar. 23-25, Bordeaux, France.
- 567 Crisp, D.J., 1974. Factors influencing the settlement of marine invertebrate larvae, in: Grant,  
568 P.T., and Mackie A.M., (Eds.) *Chemoreception in marine organisms*. Academic Press,  
569 New York, pp. 177-265.
- 570 DeWoody, J.A., Schupp, J., Kenefic, L., Busch, J., Murfitt, L., Keim, P., 2004. Universal method  
571 for producing ROX-labeled size standards suitable for automated genotyping.  
572 *BioTechniques* 37, 348-352.
- 573 Degnan, B.M., Morse, D.E., 1995. Developmental and morphogenetic gene regulation in  
574 *Haliotis rufescens* larvae at metamorphosis *Amer. Zool.* 35, 391-398.

- 575 Eri, R., Arnold, J.M., Hinman, V.F., Green, K.M., Jones, M.K., Degnan, B.M., Lavin, M.F.,  
576 1999. Hemps, a novel EGF-like protein, plays a central role in ascidian  
577 metamorphosis. *Development* 126, 5809-5818.
- 578 Gaines, S., Roughgarden, J., 1985. Larval settlement rate: a leading determinant of structure in  
579 an ecological community of the marine intertidal zone. *Proc. Natl. Acad. Sci. U.S.A.* 82,  
580 3707-3711.
- 581 Gallager, S.M., Mann, R., SASAKI, G.C., 1986. Lipid as an index of growth and viability in 3  
582 species of bivalve larvae. *Aquaculture* 56, 81-103.
- 583 Gallager, S.M. Mann, R., 1986 Growth and survival of larvae of *mercfenaria-mercenaria* (L) and  
584 *Crassostrea virginica* (Gmelin) relative to broodstock conditioning and lipid content of  
585 eggs. *Aquaculture* 56, 105-121
- 586 Gosselin, L.A., Qian, P.Y., 1996. Early post-settlement mortality of an intertidal barnacle: A  
587 critical period for survival. *Mar. Ecol. Prog. Ser.* 135, 69-75.
- 588 Gosselin L.A., Qian, P.Y., 1997. Juvenile mortality in benthic marine invertebrates. *Mar. Ecol.*  
589 *Prog. Ser.* 146, 265-282.
- 590 Hadfield, M.G., 1986. Settlement and recruitment of marine invertebrates: A perspective and  
591 some proposals. *Bull. Mar. Sci.* 39, 418-425.
- 592 Haws, M.C., DiMichele, L., Hand, S.C., 1993. Biochemical changes and mortality  
593 during metamorphosis of the Eastern oyster, *Crassostrea virginica*, and the  
594 Pacific oyster, *Crassostrea gigas*. *Mol. Mar. Biol. Biotechnol.* 2, 207-217.
- 595 Hedgecock, D., Davis, J.P., 2007. Heterosis for yield and crossbreeding of the Pacific oyster  
596 *Crassostrea gigas*. *Aquaculture* 272S, S17-S29.
- 597 Hedgecock, D., McGoldrick, D.J., Manahan, D.T., Vavra, J., Appelmans, N., Bayne, B.L., 1996.  
598 Quantitative and molecular genetic analyses of heterosis in bivalve molluscs. *J. Exp.*  
599 *Mar. Biol. Ecol.* 203, 49-59.
- 600 Helm, M.M., Holland, D.L., Utting, S.D., East, J., 1991. Fatty acid composition of early non-  
601 feeding larvae of the European flat oyster, *Ostrea edulis*. *J. Mar. Biol. Ass. U.K.* 71, 691-  
602 705.
- 603 Heylund, A., Moroz, L.L., 2006. Signaling mechanisms underlying metamorphic transitions in  
604 animals. *Integr. Comp. Biol.* 46, 743-759.
- 605 Hickman, R.W., Gruffydd, L.L.D., 1971. The histology of the larva of *Ostrea edulis* during  
606 metamorphosis, in: Crisp, E.J., (Ed.), Fourth European marine biology symposium.  
607 University Press, Cambridge, pp. 281-294.
- 608 Hubert, S., Hedgecock, D., 2004. Linkage maps of microsatellite DNA markers for the Pacific  
609 oyster *Crassostrea gigas*. *Genetics* 168, 351-362.
- 610 Hubert, S., Cognard, E., Hedgecock, D., 2009. Centromere-mapping in triploid families of the  
611 Pacific oyster *Crassostrea gigas* (Thunberg). *Aquaculture* 288, 172-183.
- 612 Hunt, H.L., Scheibling, R.E., 1997. Role of early post settlement mortality in recruitment of  
613 benthic marine invertebrates. *Mar. Ecol. Prog. Ser.* 155, 269-301.

- 614 Huvet, A., Boudry, P., Ohresser, M., Delsert, C., Bonhomme, F., 2000. Variable microsatellites  
615 in the Pacific oyster *Crassostrea gigas* and other cupped oyster species. *Anim. Genet.* 31,  
616 71-72.
- 617 Jackson, D.J., Worheide, G., Degnan, B.M., 2007. Dynamic expression of ancient and novel  
618 molluscan shell genes during ecological transitions. *BMC Evol. Biol.* 7, 1-17.
- 619 Jackson, D.J., Degnan, B.M. 2006. Expressed sequence tag analysis of genes expressed during  
620 development of the tropical abalone *Haliotis asinina*. *J. Shell. Res.* 25, 225-231.
- 621 Jackson, D.J., Ellemor, N.E., Degnan, B.M., 2005. Correlating gene expression with larval  
622 competence, and the effect of age and parentage on metamorphosis in the tropical  
623 abalone *Haliotis asinina*. *Mar. Biol.* 147, 681-697.
- 624 Jackson, D.J., Leys, S.P., Hinman, V.F., Woods, R., Lavin, M.F., Degnan, B.M., 2002.  
625 Ecological regulation of development: induction of marine invertebrate metamorphosis.  
626 *Int. J. Dev. Biol.* 46, 679-686.
- 627 Jones, G., and Jones, B., 1983. Methods for setting hatchery produced oyster larvae. Marine  
628 Resources Branch, Ministry of Environment, BC, Canada. Information report No. 4.,  
629 94pp.
- 630 Jacobs, M.W., Degnan, S.M., Woods, R., Williams, E., Roper, K., Green, K., Degnan, B.M.,  
631 2006. The effect of larval age on morphology and gene expression during ascidian  
632 metamorphosis. *Int. Comp. Biol.* 46, 60-776.
- 633 Kennedy, V.S., Newell, R.I.E., Eble, A.F., 1996. The Eastern Oyster: *Crassostrea virginica*.  
634 Maryland Sea Grant press.
- 635 Kawashima, T., Satou, Y., Murakami, S.D., Satoh, N., 2005. Dynamic changes in developmental  
636 gene expression in the basal chordate *Ciona intestinalis*. *Develop. Growth Differ.* 47,  
637 187-99.
- 638 Keough, M.J. Downes, B.J., 1982. Recruitment of marine invertebrates: the role of active larval  
639 choices and early mortality. *Oecologia (Berl)* 54, 348-352.
- 640 Li, G., Hubert, S., Bucklin, K., Ribes, V., Hedgecock, D., 2003. Characterization of 79  
641 microsatellite DNA markers in the Pacific oyster *Crassostrea gigas*. *Mol. Ecol. Notes* 3,  
642 228-232.
- 643 Magoulas, A., Gjetvag, B., Tersoglou V., Zouros, E., 1998. Three polymorphic microsatellites in  
644 the Japanese oyster, *Crassostrea gigas* (Thunberg). *Anim. Genet.* 29:69-70.
- 645 McGoldrick, D.J., Hedgecock, D., English, L.J., Baoprasertkul, P., Ward, R.D., 2000. The  
646 transmission of microsatellite alleles in Australian and North American stocks of the  
647 Pacific oyster (*Crassostrea gigas*): Selection and null alleles. *J. Shellfish Res.* 19, 779-  
648 788.
- 649 Newell, R.I.E., Alspach, G.S., Kennedy, V.S., Jacobs, D., 2000. Mortality of newly  
650 metamorphosed eastern oysters (*Crassostrea virginica*) in mesohaline Chesapeake Bay.  
651 *Mar. Biol.* 136, 665-676.



- 652 Pawlik, J.R., 1992. Induction of Marine Invertebrate Larval Settlement: Evidence for Chemical  
653 Cues, in: Paul, V.J., (Ed.), Ecological Roles of Marine Natural Products. Cornell  
654 University Series in Chemical Ecology, Cornell University Press, Pages 189-236.
- 655 Pechenik, J.A., 1990. Delayed metamorphosis by larvae of benthic marine invertebrates: Does it  
656 occur? Is there a price to pay? *Ophelia* 32, 63-94.
- 657 Pernet, F., Tremblay, R., 2004. Effect of varying levels of dietary essential fatty acid during early  
658 ontogeny of the sea scallop *Placopecten magellanicus*. *J. Exp. Mar. Bio. Ecol.* 310, 73-  
659 86.
- 660 Pineda, J., 1994. Spatial and temporal patterns in barnacle settlement rate along a southern  
661 California rocky shore. *Mar. Ecol. Prog. Ser.* 107,125-138.
- 662 Pineda, J., Starczak, V., Stueckle, T.A., 2006. Timing of successful settlement: demonstration of  
663 a recruitment window in the barnacle *Semibalanus balanoides* *Mar. Ecol. Prog. Ser.* 320,  
664 233–237.
- 665 Plough, L.V., 2012. Environmental stress increases selection against and dominance of  
666 deleterious mutations in inbred families of the Pacific oyster, *Crassostrea gigas*.  
667 *Molecular Ecology* 21, 3974-3987.
- 668 Plough, L.V., Hedgecock, D., 2011. QTL analysis of stage-specific inbreeding depression in the  
669 Pacific oyster *Crassostrea gigas*. *Genetics* 189, 1473–1486.
- 670 Raimondi, P.T., 1990. Patterns, mechanisms, and consequences of variability in settlement and  
671 recruitment in an intertidal barnacle. *Ecol. Mono.* 60, 283-309.
- 672 Rodriguez, S.R., Patricio-Ojedal, F., Inestrosa, N.C., 1993. Settlement of benthic marine  
673 invertebrates. *Mar. Ecol. Prog. Ser.* 97, 193-207.
- 674 Roughgarden J., Gaines, S., and Possingham, H., 1988. Recruitment dynamics in complex life  
675 cycles. *Science* 241, 1460-1466.
- 676 Sekino, M., Hamaguchi, M., Aranishi, F., and Okoshi, K., 2003. Development of novel  
677 microsatellite DNA markers from the Pacific oyster, *Crassostrea gigas*. *Mar. Biotechnol.*  
678 5, 227-233.
- 679 Wang, Y., Ren, R., Yu, Z., 2008. Bioinformatic mining of EST-SSR loci in the Pacific oyster,  
680 *Crassostrea gigas*. *Anim. Genet.* 39, 287-289.
- 681 Williams, E.A., Degnan, B.M., Gunter, H., Jackson, D.J., Woodcroft, B.J., Degnan, S.M., 2009.  
682 Widespread transcriptional changes pre-empt the critical pelagic–benthic transition in the  
683 vetigastropod *Haliotis asinine*. *Mol. Ecol.* 18, 1006-1025.
- 684 Yamtich J., Voigt, M.L., Li, G., Hedgecock, D., 2005. Eight microsatellite loci for the Pacific  
685 oyster *Crassostrea gigas*. *Anim. Genet.* 36: 524-526.
- 686 Yu, H., Li, Q., 2007. EST-SSR markers from the Pacific oyster, *Crassostrea gigas*. *Mol. Ecol.*  
687 *Notes* 7, 860-862.
- 688 Zaykin, D.V. Pudovkin, A.I., 1993. Two programs to estimate significance of Chi-square values  
689 using pseudo-probability test. *J. Hered.* 84, 152.



690 Table 1

691 Marker segregation data for day 18 larvae and day 60 spat

| Cross type | LG <sup>a</sup> | Marker        | Day | Genotype numbers |    |    | Total | Chi-square | P-Value |
|------------|-----------------|---------------|-----|------------------|----|----|-------|------------|---------|
| AA×AB      |                 |               |     | AA               | AB |    |       |            |         |
|            | 5               | <i>Cg139</i>  | 60  | 85               | 96 |    | 181   | 1.77       | 0.414   |
| AB×AB      |                 |               |     | AB               | AA | BB |       |            |         |
|            | 1               | <i>Cg200</i>  | 60  | 100              | 53 | 22 | 175   | 14.55      | 0.001   |
|            |                 |               | 18  | 61               | 19 | 11 | 91    | 11.97      | 0.003   |
|            |                 | <i>Cg124</i>  | 60  | 132              | 51 | 0  | 183   | 64.28      | <0.001  |
|            |                 |               | 18  | 60               | 2  | 0  | 62    | 54.39      | <0.001  |
|            | 3               | <i>um2L48</i> | 60  | 109              | 52 | 13 | 174   | 28.61      | <0.001  |
|            |                 |               | 18  | 55               | 12 | 7  | 74    | 18.19      | <0.001  |
|            |                 | <i>Cg148</i>  | 60  | 130              | 51 | 2  | 183   | 58.64      | <0.001  |
|            |                 |               | 18  | 85               | 4  | 0  | 89    | 74.08      | <0.001  |
|            |                 | <i>Cg162</i>  | 60  | 114              | 23 | 41 | 178   | 17.69      | <0.001  |
|            | 4               | <i>Cg198</i>  | 60  | 85               | 56 | 38 | 179   | 4.07       | 0.131   |
|            | 5               | <i>Cg163</i>  | 60  | 137              | 40 | 0  | 177   | 71.24      | <0.001  |
|            |                 |               | 18  | 79               | 3  | 0  | 82    | 70.66      | <0.001  |
|            |                 | <i>Cg138</i>  | 60  | 91               | 38 | 37 | 166   | 1.55       | 0.460   |
|            | 6               | <i>Cg205</i>  | 60  | 143              | 28 | 13 | 184   | 58.99      | <0.001  |
|            |                 |               | 18  | 41               | 28 | 20 | 89    | 1.99       | 0.370   |
|            |                 | <i>Cg209</i>  | 60  | 138              | 3  | 44 | 185   | 62.94      | <0.001  |
|            |                 |               | 18  | 52               | 3  | 17 | 72    | 19.67      | <0.001  |

*Table continues next page*

| Cross type | LG <sup>a</sup> | Marker        | Day | Genotype numbers |    |    |     | Total | Chi-square | P-Value |
|------------|-----------------|---------------|-----|------------------|----|----|-----|-------|------------|---------|
|            | 7               | <i>Cg28</i>   | 60  | 113              | 45 | 26 | 184 | 13.51 | 0.001      |         |
|            |                 |               | 18  | 63               | 24 | 8  | 95  | 15.51 | <0.001     |         |
|            | 8               | <i>um2L16</i> | 60  | 92               | 46 | 36 | 174 | 1.72  | 0.422      |         |
|            | 9               | <i>Cg183</i>  | 60  | 82               | 51 | 31 | 164 | 4.88  | 0.087      |         |
|            |                 | <i>Cg184</i>  | 60  | 51               | 17 | 23 | 91  | 2.12  | 0.346      |         |
|            | 10              | <i>Cg140</i>  | 60  | 99               | 32 | 41 | 172 | 4.87  | 0.088      |         |
| AB×AC      |                 |               |     | AA               | AC | AB | BC  |       |            |         |
|            | 1               | <i>cmrCg5</i> | 60  | 40               | 52 | 43 | 41  | 176   | 2.05       | 0.563   |
|            | 4               | <i>Cg109</i>  | 60  | 31               | 66 | 46 | 34  | 177   | 17.10      | 0.001   |
|            |                 |               | 18  | 18               | 28 | 17 | 26  | 89    | 4.17       | 0.244   |
|            | 7               | <i>Cg156</i>  | 60  | 24               | 40 | 40 | 52  | 156   | 10.15      | 0.017   |
|            | 8               | <i>Cg175</i>  | 60  | 27               | 27 | 50 | 51  | 155   | 14.26      | 0.003   |
|            |                 |               | 18  | 16               | 19 | 28 | 17  | 80    | 4.50       | 0.212   |
|            | 10              | <i>Cg129</i>  | 60  | 18               | 50 | 62 | 60  | 190   | 26.17      | <0.001  |
|            |                 |               | 18  | 4                | 22 | 19 | 40  | 85    | 30.81      | <0.001  |

692

693 <sup>a</sup> linkage group.  $\chi^2$  represents the goodness of fit chi-square test to expected Mendelian

694 inheritance ratios and *P*-values indicate significance of the chi-square test.

695 Table 2

696 Genotype numbers for *Cg205* during settlement

| <i>Settlers Cg205</i> |            |           |           |              |                   | <i>Larvae Cg205</i> |           |           |           |            |                 |
|-----------------------|------------|-----------|-----------|--------------|-------------------|---------------------|-----------|-----------|-----------|------------|-----------------|
| Day                   | <i>AB</i>  | <i>AA</i> | <i>BB</i> | Chi-Square   | <i>P</i> -Value   | Day                 | <i>AB</i> | <i>AA</i> | <i>BB</i> | Chi-Square | <i>P</i> -Value |
| d18                   | --         | --        | --        | --           | --                | d18                 | 41        | 20        | 28        | 1.99       | 0.370           |
| d19                   | 82         | 9         | 2         | 55.26        | <0.0001           | d19                 | 36        | 14        | 17        | 0.64       | 0.725           |
| d21                   | --         | --        | --        | --           | --                | d21                 | 42        | 5         | 24        | 12.55      | 0.002           |
| d24                   | 61         | 11        | 19        | 11.97        | 0.003             | d24                 | 27        | 5         | 47        | 52.57      | <0.0001         |
| d26                   | 30         | 3         | 7         | 10.80        | 0.005             | d26                 | 7         | 0         | 27        | 54.65      | <0.0001         |
| <b>Cum.</b>           | <b>173</b> | <b>23</b> | <b>28</b> | <b>86.50</b> | <b>&lt;0.0001</b> |                     |           |           |           |            |                 |

697

698 Chi-square represents the goodness-of-fit chi-square test to expected Mendelian inheritance ratios.

699 **Table 3**  
700 Chi-square tests of genetic heterogeneity between early and late settlement samples

| Cross type       | Marker <sup>a</sup> | LG <sup>b</sup> | Genotype numbers |           |            | Total            | $\chi^2$ P-Value <sup>c</sup> | Heterogeneity $\chi^2$ (P-value) <sup>d</sup> |
|------------------|---------------------|-----------------|------------------|-----------|------------|------------------|-------------------------------|-----------------------------------------------|
|                  |                     |                 | AA               | AB        |            |                  |                               |                                               |
| AA×AB            |                     |                 | AA               | AB        |            |                  |                               |                                               |
|                  | d19 <i>Cg139</i>    | 5               | 38               | 48        |            | 86               | 0.281                         | 1.04(0.546)                                   |
|                  | d24 <i>Cg139</i>    | 5               | 47               | 48        |            | 95               | 0.918                         |                                               |
|                  |                     |                 | <b>85</b>        | <b>96</b> |            | <b>181</b>       | <b>0.414</b>                  |                                               |
| AB×AB            |                     |                 | AB               | AA        | BB         |                  |                               |                                               |
|                  | d19 <i>Cg200</i>    | 1               | 48               | 28        | 9          | 85               | 0.007                         | 0.914(0.623)                                  |
|                  | d24 <i>Cg200</i>    | 1               | 52               | 25        | 13         | 90               | 0.068                         |                                               |
|                  |                     |                 | <b>100</b>       | <b>53</b> | <b>22</b>  | <b>175</b>       | <b>&lt;0.001</b>              |                                               |
|                  | d19 <i>Cg124</i>    | 1               | 66               | 24        | 0          | 90               | <0.001                        | 0.12(0.879)                                   |
|                  | d24 <i>Cg124</i>    | 1               | 66               | 27        | 0          | 93               | <0.001                        |                                               |
|                  |                     |                 | <b>132</b>       | <b>51</b> | <b>0</b>   | <b>183</b>       | <b>&lt;0.001</b>              |                                               |
|                  | d19 <i>L48</i>      | 3               | 58               | 24        | 4          | 86               | <0.001                        | 2.66(0.252)                                   |
|                  | d23 <i>L48</i>      | 3               | 51               | 28        | 9          | 88               | 0.005                         |                                               |
|                  |                     |                 | <b>109</b>       | <b>52</b> | <b>13</b>  | <b>174</b>       | <b>&lt;0.001</b>              |                                               |
|                  | d19 <i>Cg148</i>    | 3               | 64               | 23        | 1          | 88               | <0.001                        | 0.25(0.834)                                   |
|                  | d24 <i>Cg148</i>    | 3               | 66               | 28        | 1          | 95               | <0.001                        |                                               |
|                  |                     |                 | <b>130</b>       | <b>51</b> | <b>2</b>   | <b>183</b>       | <b>&lt;0.001</b>              |                                               |
|                  | d19 <i>Cg162</i>    | 3               | 63               | 13        | 12         | 88               | <0.001                        | 8.68(0.017)                                   |
|                  | d24 <i>Cg162</i>    | 3               | 51               | 10        | 29         | 90               | 0.008                         |                                               |
|                  |                     |                 | <b>114</b>       | <b>23</b> | <b>41</b>  | <b>178</b>       | <b>&lt;0.001</b>              |                                               |
|                  | d19 <i>Cg198</i>    | 4               | 41               | 24        | 23         | 88               | 0.806                         | 2.88(0.301)                                   |
|                  | d24 <i>Cg198</i>    | 4               | 44               | 32        | 15         | 91               | 0.04                          |                                               |
|                  |                     |                 | <b>85</b>        | <b>56</b> | <b>38</b>  | <b>179</b>       | <b>0.131</b>                  |                                               |
|                  | d19 <i>Cg163</i>    | 5               | 68               | 18        | 0          | 86               | <0.001                        | 1.39(0.654)                                   |
| d24 <i>Cg163</i> | 5                   | 69              | 22               | 0         | 91         | <0.001           |                               |                                               |
|                  |                     | <b>137</b>      | <b>40</b>        | <b>0</b>  | <b>177</b> | <b>&lt;0.001</b> |                               |                                               |
| d19 <i>Cg138</i> | 5                   | 42              | 20               | 19        | 81         | 0.934            | 0.57(0.781)                   |                                               |
| d24 <i>Cg138</i> | 5                   | 49              | 18               | 18        | 85         | 0.37             |                               |                                               |
|                  |                     | <b>91</b>       | <b>38</b>        | <b>37</b> | <b>166</b> | <b>0.46</b>      |                               |                                               |

Table continues next page

| Cross type | Marker            | LG | Genotype numbers |           |           |            | Total            | $\chi^2 P$ -Value | Heterogeneity $\chi^2$ ( $P$ -value) |
|------------|-------------------|----|------------------|-----------|-----------|------------|------------------|-------------------|--------------------------------------|
|            | d19 <i>Cg205</i>  | 6  | 82               | 9         | 2         | 93         | <0.001           | 12.87(<0.001)     |                                      |
|            | d24 <i>Cg205</i>  | 6  | 61               | 19        | 11        | 91         | 0.003            |                   |                                      |
|            |                   |    | <b>143</b>       | <b>28</b> | <b>13</b> | <b>184</b> | <b>&lt;0.001</b> |                   |                                      |
|            | d19 <i>Cg209</i>  | 6  | 65               | 1         | 27        | 93         | <0.001           | 3.06(0.339)       |                                      |
|            | d24 <i>Cg209</i>  | 6  | 73               | 2         | 17        | 92         | <0.001           |                   |                                      |
|            |                   |    | <b>138</b>       | <b>3</b>  | <b>44</b> | <b>185</b> | <b>&lt;0.001</b> |                   |                                      |
|            | d19 <i>Cg28</i>   | 7  | 51               | 24        | 14        | 89         | 0.126            | 1.23(0.532)       |                                      |
|            | d24 <i>Cg28</i>   | 7  | 62               | 21        | 12        | 95         | 0.005            |                   |                                      |
|            |                   |    | <b>113</b>       | <b>45</b> | <b>26</b> | <b>184</b> | <b>0.001</b>     |                   |                                      |
|            | d19 <i>L16</i>    | 8  | 42               | 25        | 20        | 87         | 0.712            | 1.66(0.427)       |                                      |
|            | d23 <i>L16</i>    | 8  | 50               | 21        | 16        | 87         | 0.284            |                   |                                      |
|            |                   |    | <b>92</b>        | <b>46</b> | <b>36</b> | <b>174</b> | <b>0.422</b>     |                   |                                      |
|            | d19 <i>Cg183</i>  | 9  | 37               | 19        | 15        | 71         | 0.749            | 1.20(0.553)       |                                      |
|            | d24 <i>Cg183</i>  | 9  | 45               | 32        | 16        | 93         | 0.061            |                   |                                      |
|            |                   |    | <b>82</b>        | <b>51</b> | <b>31</b> | <b>164</b> | <b>0.087</b>     |                   |                                      |
|            | d24 <i>Cg184</i>  | 9  | 23               | 10        | 13        | 46         | 0.822            | 1.40(0.516)       |                                      |
|            | d19 <i>Cg184</i>  | 9  | 28               | 7         | 10        | 45         | 0.213            |                   |                                      |
|            |                   |    | <b>51</b>        | <b>17</b> | <b>23</b> | <b>91</b>  | <b>0.346</b>     |                   |                                      |
|            | d19 <i>Cg140</i>  | 10 | 48               | 6         | 28        | 82         | 0.001            | 17.75(<0.001)     |                                      |
|            | d24 <i>Cg140</i>  | 10 | 51               | 26        | 13        | 90         | 0.069            |                   |                                      |
|            |                   |    | <b>99</b>        | <b>32</b> | <b>41</b> | <b>172</b> | <b>0.088</b>     |                   |                                      |
| AB×AC      |                   |    | AA               | AC        | AB        | BC         |                  |                   |                                      |
|            | d19 <i>cmrCg5</i> | 1  | 25               | 25        | 17        | 17         | 84               | 0.384             | 5.30(0.159)                          |
|            | d24 <i>cmrCg5</i> | 1  | 15               | 27        | 26        | 24         | 92               | 0.271             |                                      |
|            |                   |    | <b>40</b>        | <b>52</b> | <b>43</b> | <b>41</b>  | <b>176</b>       | <b>0.563</b>      |                                      |
|            | d19 <i>Cg109</i>  | 4  | 19               | 22        | 24        | 21         | 86               | 0.895             | 10.75(0.02)                          |
|            | d24 <i>Cg109</i>  | 4  | 12               | 44        | 22        | 13         | 91               | 0                 |                                      |
|            |                   |    | <b>31</b>        | <b>66</b> | <b>46</b> | <b>34</b>  | <b>177</b>       | <b>0.001</b>      |                                      |

Table continues next page

| Cross type | Marker           | LG | Genotype numbers |           |           |           | Total      | P-Value      | Heterogeneity $\chi^2$ (P-value) |
|------------|------------------|----|------------------|-----------|-----------|-----------|------------|--------------|----------------------------------|
|            | d19 <i>Cg156</i> | 7  | 9                | 17        | 21        | 24        | 71         | 0.068        | 1.56(0.673)                      |
|            | d24 <i>Cg156</i> | 7  | 15               | 23        | 19        | 28        | 85         | 0.225        |                                  |
|            |                  |    | <b>24</b>        | <b>40</b> | <b>40</b> | <b>52</b> | <b>156</b> | <b>0.017</b> |                                  |
|            | d19 <i>Cg175</i> | 8  | 7                | 11        | 20        | 29        | 67         | 0.001        | 7.43(0.068)                      |
|            | d23 <i>Cg175</i> | 8  | 20               | 16        | 30        | 22        | 88         | 0.193        |                                  |
|            |                  |    | <b>27</b>        | <b>27</b> | <b>50</b> | <b>51</b> | <b>155</b> | <b>0.003</b> |                                  |
|            | d19 <i>Cg129</i> | 10 | 9                | 22        | 27        | 38        | 96         | 0            | 5.99(0.108)                      |
|            | d24 <i>Cg129</i> | 10 | 9                | 28        | 35        | 22        | 94         | 0.001        |                                  |
|            |                  |    | <b>18</b>        | <b>50</b> | <b>62</b> | <b>60</b> | <b>190</b> | <b>0</b>     |                                  |

701

702 <sup>a</sup> Marker data arranged by day of spat sampling (day 19 or 24); Goodness-of-fit chi-square test of  
 703 segregation ratios to Mendelian expectation; <sup>b</sup> Linkage group; <sup>c</sup> chi-square goodness of fit test for  
 704 expected Mendelian inheritance (single marker segregation distortion); <sup>d</sup> r×c contingency chi-  
 705 square test for heterogeneity in segregation ratios between day 19 and day 24 spat samples, P-  
 706 value in parentheses (Zaykin and Pudovkin 1992).

707 **Table 4**  
 708  
 709 QTL and ANOVA model results for settlement timing

| QTL               | LG <sup>a</sup> | Position (cM) <sup>b</sup> | Marker <sup>c</sup> | LOD <sup>d</sup> | % Var. <sup>e</sup> | P-Value ( $\chi^2$ ) |
|-------------------|-----------------|----------------------------|---------------------|------------------|---------------------|----------------------|
| 1                 | 4               | 0.0                        | <i>Cg109</i>        | 2.567            | 3.84                | 0.030                |
| 2                 | 6               | 1.0                        | <i>Cg205</i>        | 2.714            | 7.085               | 0.001                |
| 3                 | 10              | 1.0                        | <i>Cg140</i>        | 3.794            | 8.7                 | <0.001               |
|                   | 5               | 10.0 <sup>f</sup>          | --                  | --               | 6.66                | 0.210                |
|                   | 8               | 40 <sup>f</sup>            | --                  | --               | 5.18                | 0.079                |
| 4                 | 5:8             | 10:40                      | --                  | 5.642            | 6.97                | 0.052                |
| <b>Full model</b> |                 |                            |                     |                  | <b>29.9</b>         | <b>&lt;0.00001</b>   |

710  
 711 <sup>a</sup> linkage group number; <sup>b</sup> position along linkage group, in centimorgans (cM), the colon  
 712 represents interaction between the two positions for QTL 4; <sup>c</sup> markers closely linked to QTL, if  
 713 any (within 15 cM); <sup>d</sup> LOD represents the log of the odds (LOD) score for each identified QTL; <sup>e</sup>  
 714 percent variance explained by the individual QTL or the full model; <sup>f</sup> these genomic positions  
 715 were not significant QTL in the 1-dimensional scan and, thus, were not assigned numbers;  
 716 because a significant interaction between them was detected in the two-dimensional scan, R/qtl  
 717 includes them in the hierarchical ANOVA model by convention, thus their effects are reported.  
 718



719

720 **Figure 1**

721 Pictures of shell deployment and bags with spat for grow-out

A

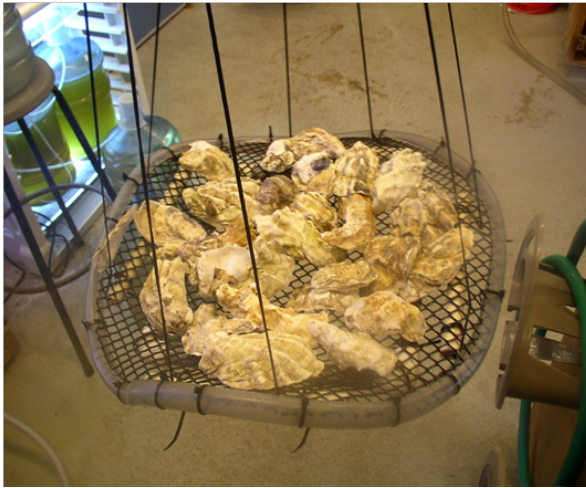

B

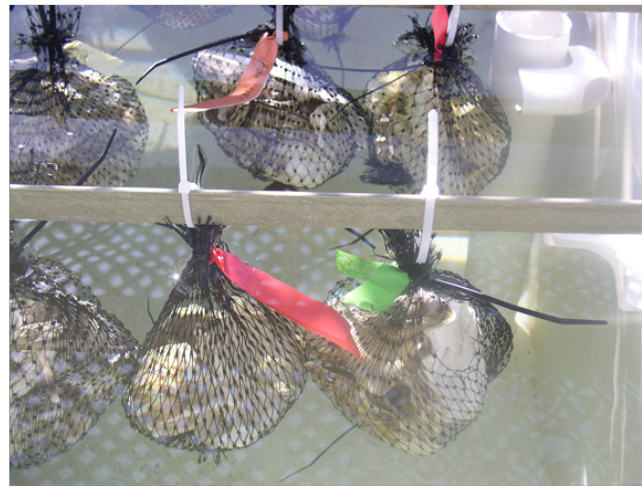

722

723 The collection of shells deployed each day on the Vexar® harness (A), and shells with spat separated in bags in the nursery system for  
724 grow-out (B).

725

726 **Figure 2**

727 Settlement and Mortality data

728

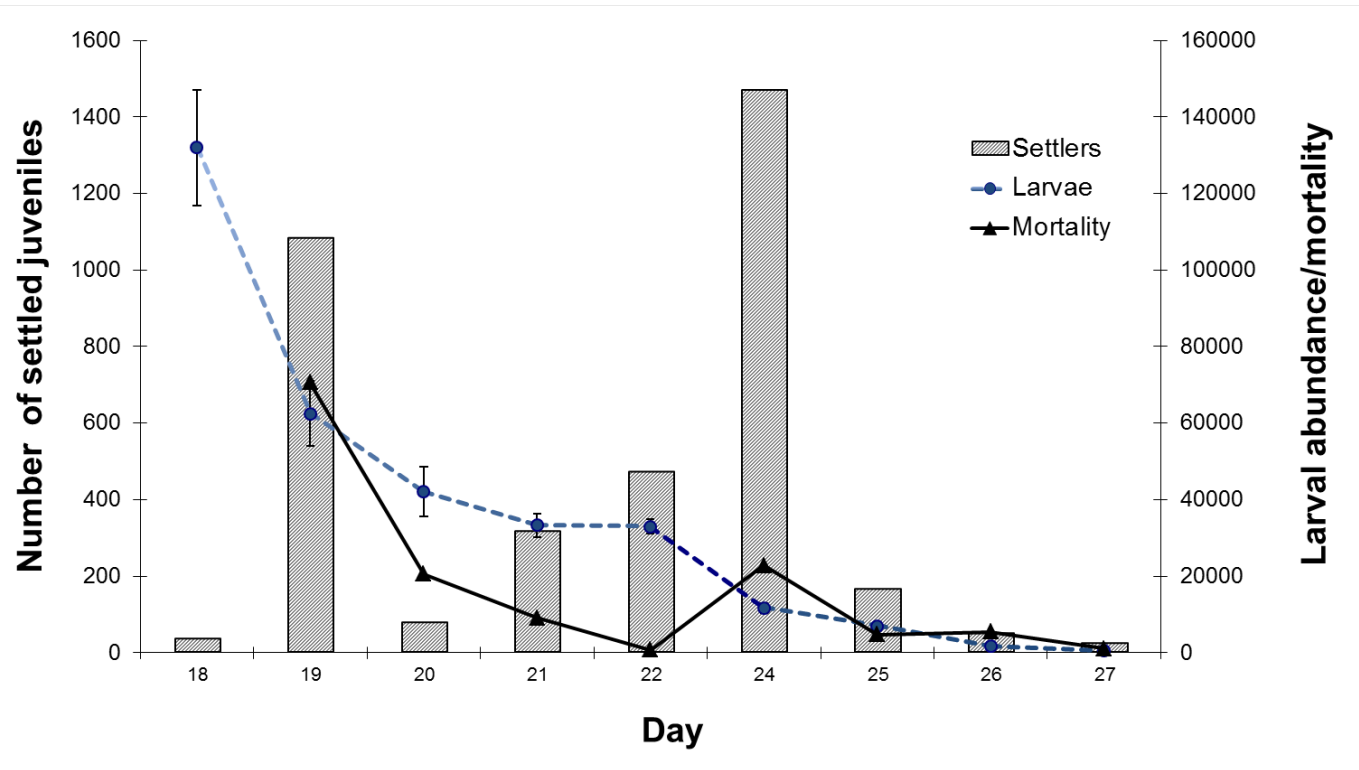

729

730

731 Mortality is calculated as the difference in the abundance of larvae between days, accounting for the number new

732 settlers. Error bars on the larval abundance estimates represent one standard error of the mean from volumetric counts.

733

734

735 **Figure 3**736 *Cg205* genotype proportions in larvae and spat during settlement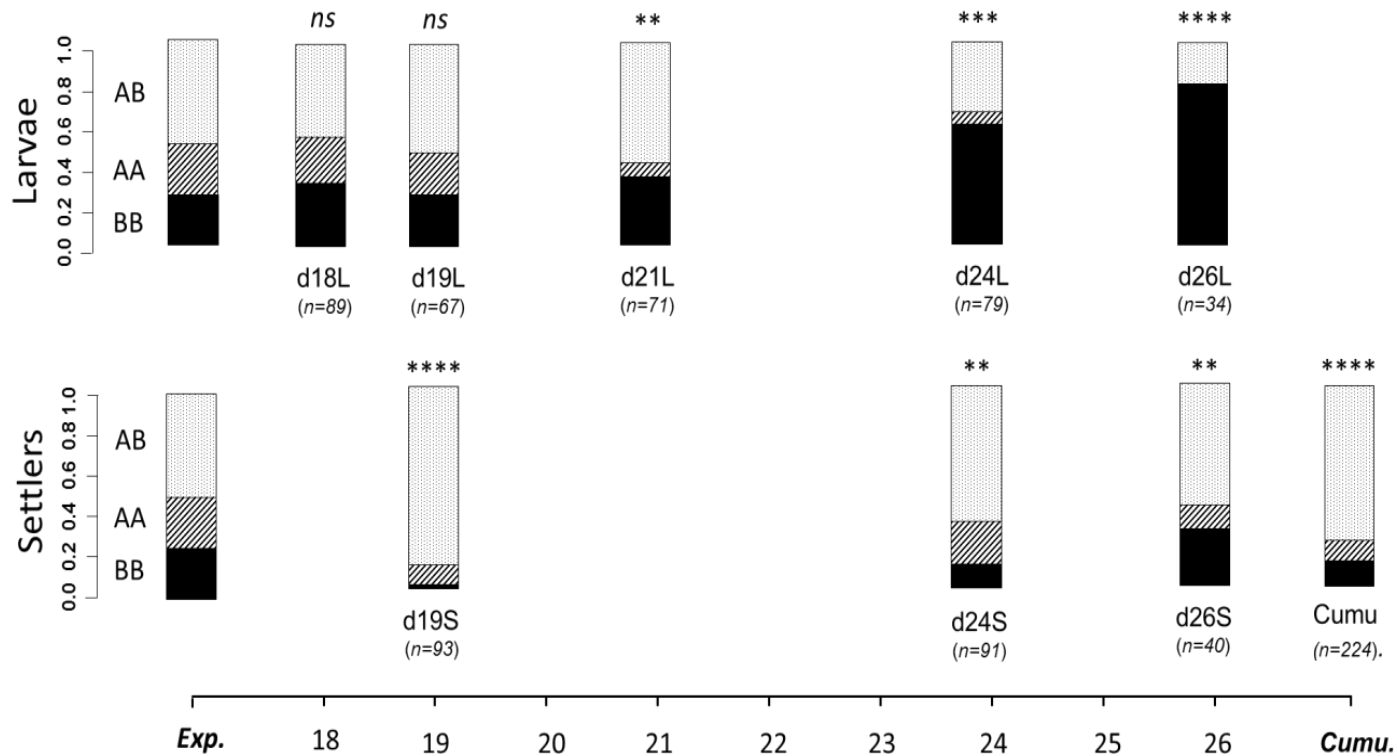

737

738 Asterisks denote the level of significance for the goodness-of-fit chi-square test (*cf.* Mendelian expectations of 2:1:1, *AB:AA:BB*) of  
 739 genotype proportions at *Cg205* (\*  $P < 0.05$ , \*\*  $P < 0.01$ , \*\*\*  $P < 0.001$ , \*\*\*\*  $P < 0.0001$ ); *ns* is non-significant. The cumulative (cumu)  
 740 sample is the pooling of all spat collected during settlement (e.g. d19, d24, and d26).

741 **Figure 4**

742 Plot of genotype effects on settlement timing for *Cg140*

743

744

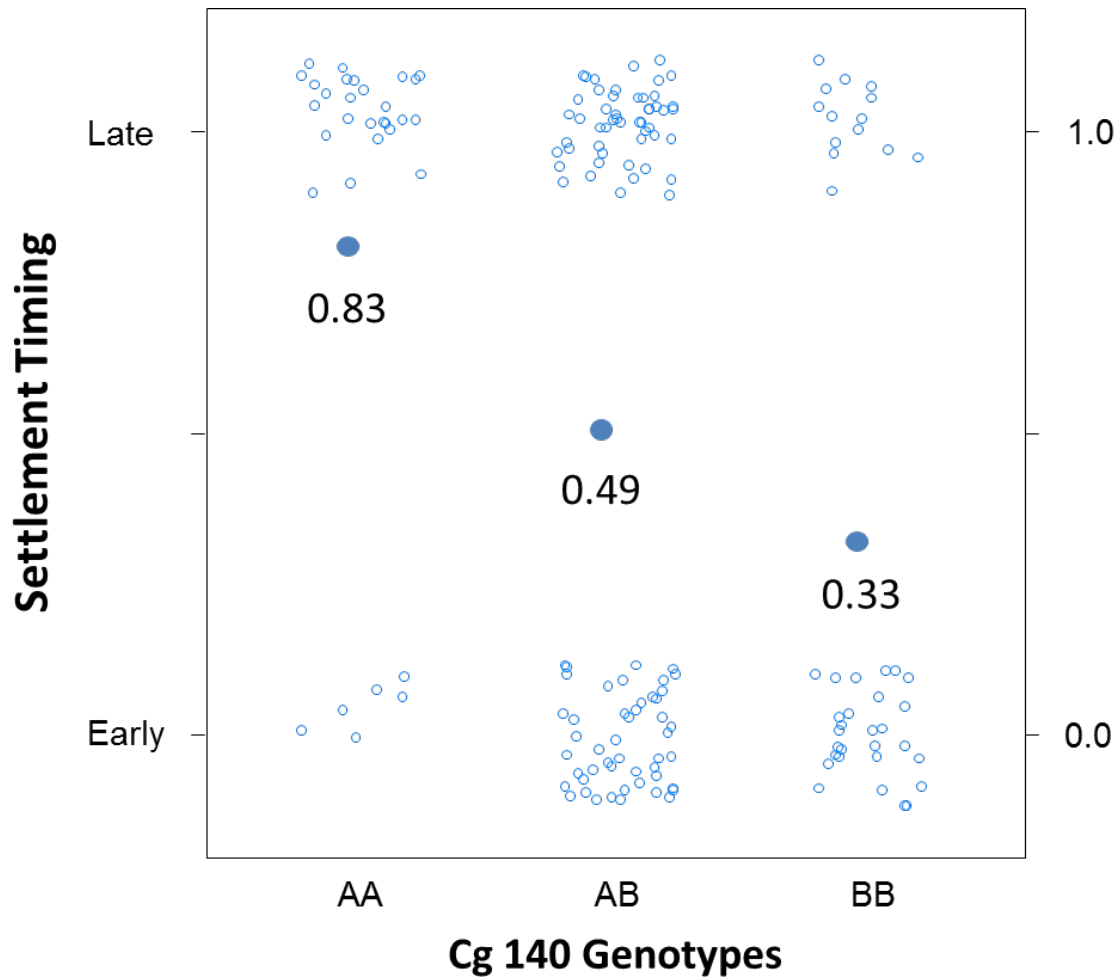

745

746 Values (0 or 1, corresponding to early and late settlement, respectively) are jittered and

747 represented by open circles. Large blue filled circles represent mean  $p$  (value of  $p$  displayed

748 below filled circles), the binomial probability of late settlement for individuals of each genotype,

749 *AA*, *AB*, and *BB*, which shows an additive pattern of gene effects at this marker.

750 **Figure 5**751 Plot of genotype effects on settlement timing for *Cg205* and *Cg109*

752

**A**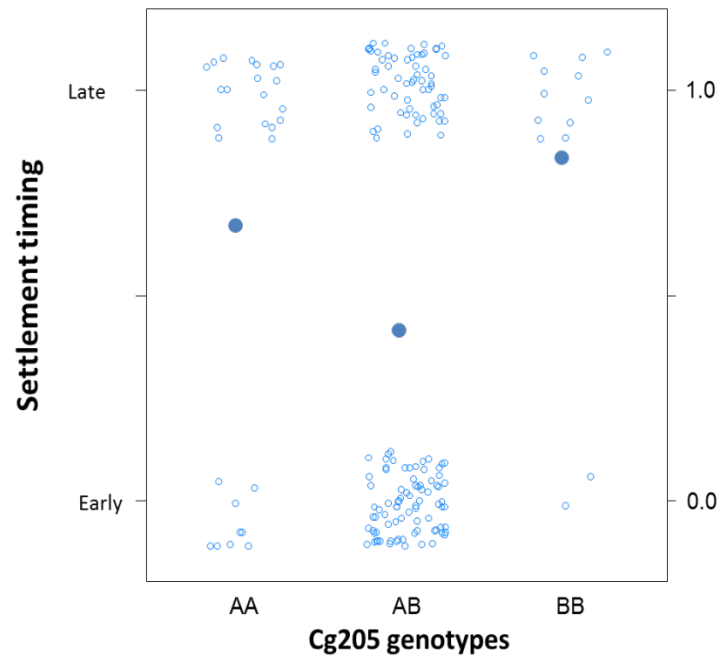**B**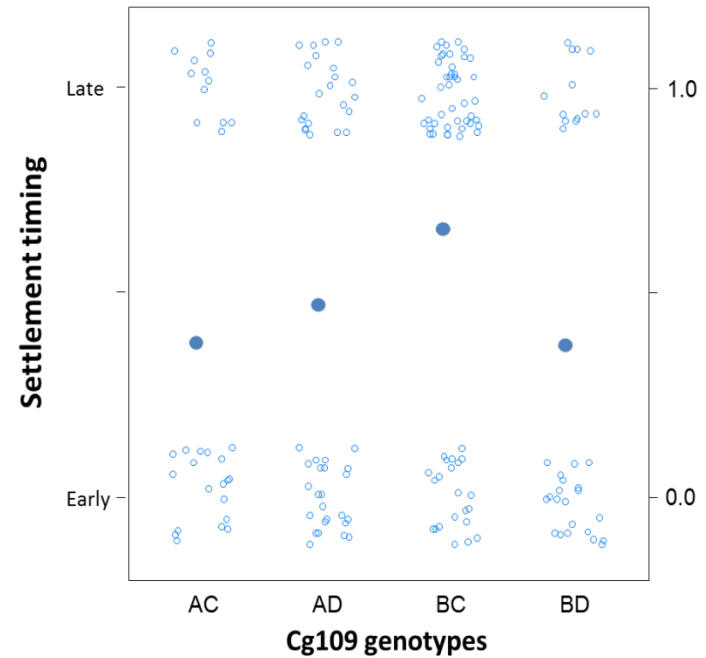

753

754 Values (0 or 1, corresponding to early and late settlement, respectively) are jittered and represented by open circles for *Cg205* (panel  
 755 A) and *Cg209* (panel B). Large blue filled circles represent mean  $p$ , the binomial probability of late settlement for individuals of each  
 756 genotype.
